# Supplementary material for: Novel gas exchange analysis in COVID-19 lung disease
Source: PubMed Central journal article supplement — Eur Respir J. 2023 Jan 26;61(1):2201962. doi: 10.1183/13993003.01962-2022 (PMC9881223; doi:10.1183/13993003.01962-2022), 2023-01-26

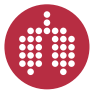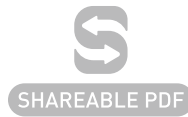

# Novel gas exchange analysis in COVID-19 lung disease

Mike Hughes

National Heart and Lung Institute, Imperial College School of Medicine, Hammersmith Hospital, London, UK.

Corresponding author: Mike Hughes ([mike.hughes@imperial.ac.uk](mailto:mike.hughes@imperial.ac.uk))

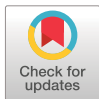

Shareable abstract (@ERSpublications)

**A new method of measuring mean alveolar  $P_{O_2}$  and  $P_{CO_2}$  (as opposed to the classical ideal alveolar air analysis) with arterial  $P_{O_2}$  and  $P_{CO_2}$ , is applied to patients with COVID-19 lung disease, acutely and after recovery** <https://bit.ly/3Tuaffb>

**Cite this article as:** Hughes M. Novel gas exchange analysis in COVID-19 lung disease. *Eur Respir J* 2023; 61: 2201962 [DOI: 10.1183/13993003.01962-2022].

This single-page version can be shared freely online.

Copyright ©The authors 2023.

This version is distributed under the terms of the Creative Commons Attribution Non-Commercial Licence 4.0. For commercial reproduction rights and permissions contact [permissions@ersnet.org](mailto:permissions@ersnet.org)

Received: 9 Oct 2022  
Accepted: 11 Oct 2022

The study by HARBUT *et al.* [1] reported in this issue of the *European Respiratory Journal* analyses gas exchange in patients with acute coronavirus disease 2019 (COVID-19) lung disease; arterial oxygen and carbon dioxide tension ( $P_{O_2}$  and  $P_{CO_2}$ ) and the mean (or mixed) value for alveolar ( $\bar{A}$ )  $P_{O_2}$  and  $P_{CO_2}$  (not an “ideal” [2] but the actual value) were measured, when patients (and healthy controls) were breathing air. From the mean alveolar to arterial  $P_{O_2}$  and arterial to mean alveolar  $P_{CO_2}$  gradients ( $\bar{A}aP_{O_2}$  and  $a\bar{A}P_{CO_2}$ ), the authors computed intrapulmonary shunt and alveolar dead space using the classical three compartment model of RILEY and COURNAND [2] (but, with important differences: see later). HARBUT *et al.* [1] argued that intrapulmonary shunt should be a marker for alveolar consolidation, as in lobar pneumonia, but at a more microscopic level; alveolar dead space, on the other hand, should be a surrogate for pulmonary microvascular obstruction and thrombosis, *e.g.* following severe endothelial injury.

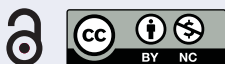

Supplement: ERJ-01962-2022.Shareable.pdf [file ERJ-01962-2022.Shareable.pdf]
